# Supplementary material for: Population Genetic Analysis Reveals a High Genetic Diversity in the Brazilian Cryptococcus gattii VGII Population and Shifts the Global Origin from the Amazon Rainforest to the Semi-arid Desert in the Northeast of Brazil
Source: PLoS Negl Trop Dis. 2016 Aug 16;10(8):e0004885. doi: 10.1371/journal.pntd.0004885 (PMC4986980; doi:10.1371/journal.pntd.0004885)
Supplement: S1 Table — (XLSX) [file pntd.0004885.s001.xlsx]

## Sheet: Plan1
Strain	Other numbers	Mating type	Year of isolation	Source	Country	State	Region	ISHAM - CAP59	GenBank Number	ISHAM - GPD1	GenBank Number	ISHAM - IGS1	GenBank Number	ISHAM - LAC1	GenBank Number	ISHAM - PLB1	GenBank Number	ISHAM - SOD1	GenBank Number	ISHAM - URA5	GenBank Number	ISHAM - Sequence Type	Reference	PMID number
CFP 4	34A glice	alpha	2004	Clinical	Brazil	Pará	North	14	KU713697	6	KU713843	43	KU713548	4	KU713992	26	KU714142	53	KU714292	7	KU725512	121	This study	NA
CFP 6	51A	alpha	2005	Clinical	Brazil	Pará	North	1	KU713698	1	KU713844	4	KU713549	4	KU713993	1	KU714143	14	KU714293	7	KU725513	20	This study	NA
CFP 14	24B/LMM 1429	alpha	2003	Clinical	Brazil	Pará	North	2	KU713699	6	KU713845	35	KU713550	4	KU713994	1	KU714144	52	KU714294	7	KU725514	119	This study	NA
CFP 16	23A	alpha	2003	Clinical	Brazil	Pará	North	2	KU713700	6	KU713846	35	KU713551	4	KU713995	1	KU714145	52	KU714295	7	KU725515	119	This study	NA
CFP 18	26A	alpha	2003	Clinical	Brazil	Pará	North	1	KU713701	1	KU713847	4	KU713552	4	KU713996	1	KU714146	14	KU714296	7	KU725516	20	This study	NA
CFP 19	27A	alpha	2003	Clinical	Brazil	Pará	North	28	KU713702	6	KU713848	50	KU713553	25	KU713997	1	KU714147	1	KU714297	7	KU725517	120	This study	NA
CFP 27	35A	alpha	2004	Clinical	Brazil	Pará	North	14	KU713703	6	KU713849	43	KU713554	4	KU713998	26	KU714148	53	KU714298	7	KU725518	121	This study	NA
CFP 28	36A	alpha	2003	Clinical	Brazil	Pará	North	3	KU713704	16	KU713850	15	KU713555	4	KU713999	9	KU714149	23	KU714299	2	KU725519	5	This study	NA
CFP 29	37A	alpha	2003	Clinical	Brazil	Pará	North	3	KU713705	16	KU713851	15	KU713556	4	KU714000	9	KU714150	23	KU714300	2	KU725520	5	This study	NA
CFP 32	40A	alpha	2004	Clinical	Brazil	Pará	North	1	KU713706	1	KU713852	4	KU713557	4	KU714001	1	KU714151	56	KU714301	7	KU725521	122	This study	NA
CFP 47	56A	alpha	2005	Clinical	Brazil	Pará	North	3	KU713707	16	KU713853	15	KU713558	4	KU714002	9	KU714152	23	KU714302	2	KU725522	5	This study	NA
CFP 48	57A	alpha	2005	Clinical	Brazil	Pará	North	1	KU713708	1	KU713854	4	KU713559	4	KU714003	1	KU714153	14	KU714303	7	KU725523	20	This study	NA
CFP 51	60B	alpha	2005	Clinical	Brazil	Pará	North	8	KU713709	6	KU713855	35	KU713560	54	KU714004	1	KU714154	103	KU714304	7	KU725524	297	This study	NA
CFP 72	LMM 972	alpha	2001	Clinical	Brazil	Mato Grosso do Sul	Central West	4	KU713710	22	KU713856	26	KU713561	4	KU714005	27	KU714155	7	KU714305	3	KU725525	40	This study	NA
CFP 77	LMM 17	alpha	1994	Clinical	Brazil	São Paulo	Southeast	40	KU713711	35	KU713857	57	KU713562	4	KU714006	1	KU714156	59	KU714306	2	KU725526	129	This study	NA
CFP 78	LMM 994, WM 05.551	alpha	2001	Clinical	Brazil	Mato Grosso do Sul	Central West	15	KU713712	6	KU713858	26	KU713563	28	KU714007	22	KU714157	10	KU714307	2	KU725527	136	This study	NA
CFP 79	LMM 901	alpha	1999	Clinical	Brazil	Mato Grosso do Sul	Central West	15	KU713713	6	KU713859	26	KU713564	28	KU714008	22	KU714158	10	KU714308	2	KU725528	136	This study	NA
CFP 105	LILINE 7	alpha	2007	Clinical	Brazil	Piauí	Northeast	2	KU713714	16	KU713860	54	KU713565	4	KU714009	26	KU714159	15	KU714309	7	KU725529	127	This study	NA
CFP 114	LMM 655	alpha	1995	Environmental	Brazil	Piauí	Northeast	2	KU713715	16	KU713861	56	KU713566	4	KU714010	26	KU714160	14	KU714310	2	KU725530	134	This study	NA
CFP 121	77A	alpha	NA	Clinical	Brazil	Pará	North	1	KU713716	1	KU713862	4	KU713567	4	KU714011	1	KU714161	14	KU714311	7	KU725531	20	This study	NA
CFP 151	LMM 266	alpha	1989	Clinical	Brazil	Rio de Janeiro	Southeast	34	KU713717	6	KU713863	9	KU713568	4	KU714012	16	KU714162	9	KU714312	2	KU725532	28	This study	NA
CFP 156		alpha	2009	Clinical	Brazil	Rio de Janeiro	Southeast	4	KU713718	6	KU713864	50	KU713569	29	KU714013	1	KU714163	101	KU714313	2	KU725533	273	This study	NA
CFP 158	LMM 1195	alpha	2005	Clinical	Brazil	Rio de Janeiro	Southeast	4	KU713719	22	KU713865	26	KU713570	4	KU714014	27	KU714164	7	KU714314	3	KU725534	40	This study	NA
CFP 165	LMM 1030	alpha	2002	Clinical	Brazil	Amazonas	Northeast	1	KU713720	1	KU713866	4	KU713571	4	KU714015	1	KU714165	14	KU714315	7	KU725535	20	This study	NA
CFP 167	LMM 722	alpha	1999	Clinical	Brazil	Amazonas	Northeast	3	KU713721	16	KU713867	15	KU713572	4	KU714016	9	KU714166	15	KU714316	2	KU725536	288	This study	NA
CFP 171	LMM 724	alpha	1999	Clinical	Brazil	Amazonas	Northeast	1	KU713722	1	KU713868	4	KU713573	4	KU714017	1	KU714167	14	KU714317	7	KU725537	20	This study	NA
CFP 172	LMM 718	alpha	1999	Clinical	Brazil	Amazonas	Northeast	3	KU713723	16	KU713869	15	KU713574	4	KU714018	9	KU714168	23	KU714318	2	KU725538	5	This study	NA
CFP 174	LMM 624, WM 05.465	alpha	1997	Clinical	Brazil	Amazonas	Northeast	2	KU713724	6	KU713870	10	KU713575	4	KU714019	2	KU714169	15	KU714319	2	KU725539	7	[1]	25028429
CFP 200	1827	alpha	2008	Clinical	Brazil	Amazonas	Northeast	3	KU713725	16	KU713871	15	KU713576	4	KU714020	9	KU714170	23	KU714320	2	KU725540	5	This study	NA
CFP 201	4201	alpha	2010	Clinical	Brazil	Amazonas	Northeast	4	KU713726	21	KU713872	36	KU713577	4	KU714021	18	KU714171	22	KU714321	2	KU725541	274	This study	NA
CFP 202	2818	alpha	2008	Clinical	Brazil	Amazonas	Northeast	1	KU713727	1	KU713873	4	KU713578	4	KU714022	1	KU714172	14	KU714322	7	KU725542	20	This study	NA
CFP 224	4573 AM	alpha	NA	Clinical	Brazil	Amazonas	Northeast	3	KU713728	16	KU713874	15	KU713579	4	KU714023	9	KU714173	23	KU714323	2	KU725543	5	This study	NA
CFP 230	LMM 989	alpha	2001	Clinical	Brazil	Mato Grosso do Sul	Central West	4	KU713729	22	KU713875	26	KU713580	4	KU714024	27	KU714174	7	KU714324	3	KU725544	40	This study	NA
CFP 231	LMM 832	alpha	2000	Clinical	Brazil	Mato Grosso do Sul	Central West	38	KU713730	22	KU713876	53	KU713581	21	KU714025	2	KU714175	58	KU714325	2	KU725545	135	This study	NA
CFP 240	LILINE 35	alpha	2008	Clinical	Brazil	Piauí	Northeast	2	KU713731	16	KU713877	27	KU713582	21	KU714026	2	KU714176	98	KU714326	2	KU725546	275	This study	NA
CFP 241	LILINE 36	alpha	2008	Clinical	Brazil	Piauí	Northeast	2	KU713732	16	KU713878	80	KU713583	4	KU714027	9	KU714177	102	KU714327	2	KU725547	276	This study	NA
CFP 243	LILINE 40	alpha	2009	Clinical	Brazil	Piauí	Northeast	2	KU713733	6	KU713879	15	KU713584	4	KU714028	2	KU714178	15	KU714328	2	KU725548	278	This study	NA
CFP 249	LILINE 46	alpha	2008	Clinical	Brazil	Piauí	Northeast	2	KU713734	16	KU713880	54	KU713585	4	KU714029	26	KU714179	15	KU714329	7	KU725549	127	This study	NA
CFP 252	LILINE 49	alpha	NA	Clinical	Brazil	Piauí	Northeast	33	KU713735	6	KU713881	87	KU713586	29	KU714030	1	KU714180	1	KU714330	1	KU725550	295	This study	NA
CFP 255	LILINE 55	alpha	2010	Clinical	Brazil	Piauí	Northeast	1	KU713736	6	KU713882	25	KU713587	4	KU714031	2	KU714181	15	KU714331	7	KU725551	286	This study	NA
CFP 256	LILINE 56	alpha	NA	Clinical	Brazil	Piauí	Northeast	2	KU713737	6	KU713883	38	KU713588	16	KU714032	9	KU714182	99	KU714332	2	KU725552	279	This study	NA
CFP 258	LILINE 58	alpha	NA	Clinical	Brazil	Piauí	Northeast	2	KU713738	6	KU713884	87	KU713589	4	KU714033	1	KU714183	1	KU714333	2	KU725553	280	This study	NA
CFP 259	LILINE 62	alpha	2010	Clinical	Brazil	Piauí	Northeast	2	KU713739	16	KU713885	54	KU713590	4	KU714034	26	KU714184	15	KU714334	7	KU725554	127	This study	NA
CFP 386	LILINE 1	alpha	2007	Clinical	Brazil	Piauí	Northeast	39	KU713740	34	KU713886	51	KU713591	21	KU714035	1	KU714185	54	KU714335	2	KU725555	123	This study	NA
CFP 421	68B	alpha	2005	Clinical	Brazil	Pará	North	3	KU713741	6	KU713887	15	KU713592	4	KU714036	9	KU714186	23	KU714336	2	KU725556	296	This study	NA
CFP 422	LMM 920.7.1	alpha	2001	Clinical	Brazil	Piauí	Northeast	33	KU713742	6	KU713888	10	KU713593	29	KU714037	1	KU714187	1	KU714337	1	KU725557	1	This study	NA
CFP 423	LMM 561	alpha	1997	Environmental	Brazil	Piauí	Northeast	2	KU713743	16	KU713889	55	KU713594	4	KU714038	26	KU714188	15	KU714338	2	KU725558	132	This study	NA
CFP 424	LMM 855, WM 05.529	alpha	1997	Clinical	Brazil	Roraima	North	2	KU713744	32	FR677278	25	FR677320	30	FR677287	1	KU714189	13	FR677301	7	KU725559	27	[2]	21383989
CFP 425	LMM 260, WM 05.414	alpha	1989	Clinical	Brazil	Rio de Janeiro	Southeast	2	KU713745	6	KU713890	15	KU713595	4	KU714039	16	KU714190	6	KU714339	2	KU725560	10	This study	NA
CFP 426	547.18.13B1	alpha	1994	Environmental	Brazil	Piauí	Northeast	2	KU713746	16	KU713891	10	KU713596	4	KU714040	26	KU714191	15	KU714340	2	KU725561	277	This study	NA
CFP 430	LMM 819, WM 05.547	alpha	2001	Clinical	Brazil	Bahia	Northeast	13	KU713747	6	KU713892	32	KU713597	26	KU714041	18	KU714192	17	KU714341	8	KU725562	293	[1]	25028429
CFP 431	LMM 566	alpha	1997	Clinical	Brazil	Piauí	Northeast	1	KU713748	22	KU713893	27	KU713598	21	KU714042	27	KU714193	7	KU714342	4	KU725563	287	This study	NA
CFP 433	LMM 551	alpha	1994	Environmental	Brazil	Piauí	Northeast	14	KU713749	6	KU713894	15	KU713599	4	KU714043	2	KU714194	15	KU714343	2	KU725564	124	This study	NA
CFP 435	LMM 265	alpha	1989	Clinical	Brazil	Rio de Janeiro	Southeast	34	KU713750	6	KU713895	9	KU713600	4	KU714044	16	KU714195	9	KU714344	2	KU725565	28	This study	NA
CFP 436	LMM 900	alpha	2000	Clinical	Brazil	Mato Grosso do Sul	Central West	38	KU713751	22	KU713896	53	KU713601	21	KU714045	2	KU714196	58	KU714345	2	KU725566	135	This study	NA
CFP 437	547.18.13A3	alpha	1994	Environmental	Brazil	Piauí	Northeast	2	KU713752	16	KU713897	42	KU713602	4	KU714046	26	KU714197	15	KU714346	2	KU725567	26	This study	NA
CFP 438	LMM 576	alpha	1997	Clinical	Brazil	Piauí	Northeast	8	KU713753	16	KU713898	16	KU713603	4	KU714047	9	KU714198	8	KU714347	7	KU725568	290	This study	NA
CFP 439	LMM 645	alpha	1998	Environmental	Brazil	Roraima	North	27	KU713754	6	KU713899	42	KU713604	25	KU714048	1	KU714199	24	KU714348	7	KU725569	133	This study	NA
CFP 440	LMM 633	a	1997	Clinical	Brazil	Bahia	Northeast	2	KU713755	6	KU713900	16	KU713605	4	KU714049	16	KU714200	4	KU714349	2	KU725570	283	This study	NA
CFP 441	LMM 1035, WM 05.556	alpha	2002	Clinical	Brazil	Amazonas	North	3	KU713756	16	KU713901	15	KU713606	4	KU714050	9	KU714201	23	KU714350	2	KU725571	5	This study	NA
CFP 442	LMM 434	a	1996	Environmental	Brazil	Piauí	Northeast	2	KU713757	27	KU713902	49	KU713607	4	KU714051	1	KU714202	8	KU714351	7	KU725572	131	This study	NA
CFP 443	LMM 414	alpha	1995	Environmental	Brazil	Piauí	Northeast	8	KU713758	16	KU713903	35	KU713608	4	KU714052	2	KU714203	3	KU714352	2	KU725573	130	This study	NA
CFP 444	LMM 818, WM 05.546	alpha	2001	Clinical	Brazil	Bahia	Northeast	13	KU713759	6	KU713904	32	KU713609	26	KU714053	18	KU714204	17	KU714353	8	KU725574	293	[1]	25028429
CFP 445	LMM 893	alpha	2000	Clinical	Brazil	Mato Grosso do Sul	Central West	10	KU713760	6	KU713905	16	KU713610	4	KU714054	16	KU714205	20	KU714354	2	KU725575	185	This study	NA
CFP 449	LMM 727	alpha	1998	Clinical	Brazil	Piauí	Northeast	14	KU713761	6	KU713906	15	KU713611	4	KU714055	2	KU714206	15	KU714355	2	KU725576	124	This study	NA
CFP 450	LMM 892, WM 05.533	alpha	1997	Clinical	Brazil	Mato Grosso do Sul	Central West	10	FR677268	6	KU713907	16	KU713612	4	KU714056	16	FR677292	20	FR677306	2	KU725577	185	[1, 2]	21383989 ; 25028429
CFP 451	LMM 417, LA55, WM 05.452	a	1995	Clinical	Brazil	Piauí	Northeast	2	KU713762	27	FR677277	31	KU713613	4	KU714057	1	KU714207	8	KU714356	7	KU725578	19	[1, 2]	21383989 ; 25028429
CFP 452	LMM 638, WM 05.536	a	1997	Clinical	Brazil	Bahia	Northeast	2	KU713763	6	KU713908	16	KU713614	4	KU714058	16	KU714208	4	KU714357	2	KU725579	283	[1]	25028429
CFP 453	LMM 1003, WM 05.552	alpha	2002	Clinical	Brazil	Piauí	Northeast	14	KU713764	6	KU713909	35	KU713615	21	KU714059	28	KU714209	1	KU714358	7	KU725580	292	[1]	25028429
CFP 454	LMM 866, WM 05.531	alpha	2001	Clinical	Brazil	Roraima	North	1	KU713765	1	KU713910	4	KU713616	4	KU714060	1	KU714210	14	KU714359	7	KU725581	20	This study	NA
CFP 455	LMM 634, WM 05.527	alpha	1997	Clinical	Brazil	Bahia	Northeast	34	KU713766	6	KU713911	9	KU713617	4	KU714061	16	KU714211	9	KU714360	2	KU725582	28	[1]	25028429
CFP 457	LMM 860, WM 05.530	alpha	1999	Clinical	Brazil	Roraima	North	1	KU713767	22	KU713912	27	KU713618	21	KU714062	27	KU714212	7	KU714361	4	KU725583	287	[1]	25028429
CFP 458	LMM 567, WM 05.461	alpha	1997	Clinical	Brazil	Piauí	Northeast	8	KU713768	6	KU713913	25	KU713619	4	KU714063	1	KU714213	16	KU714362	6	KU725584	289	[1]	25028429
CFP 459	LMM 631, WM 05.525	alpha	1997	Clinical	Brazil	Bahia	Northeast	27	KU713769	6	KU713914	42	KU713620	25	KU714064	1	KU714214	24	KU714363	7	KU725585	133	[1]	25028429
CFP 461	LMM 1194	alpha	2006	Clinical	Brazil	Rio de Janeiro	Southeast	74	KU713770	6	KU713915	89	KU713621	29	KU714065	1	KU714215	1	KU714364	2	KU725586	299	This study	NA
CFP 462	LMM 484	alpha	1995	Environmental	Brazil	Piauí	Northeast	14	KU713771	6	KU713916	15	KU713622	4	KU714066	2	KU714216	15	KU714365	2	KU725587	124	This study	NA
CFP 463	LMM 415	alpha	1995	Environmental	Brazil	Piauí	Northeast	14	KU713772	6	KU713917	15	KU713623	4	KU714067	2	KU714217	15	KU714366	2	KU725588	124	This study	NA
CFP 464	83A	alpha	NA	Clinical	Brazil	Pará	North	8	KU713773	6	KU713918	26	KU713624	4	KU714068	24	KU714218	57	KU714367	2	KU725589	298	This study	NA
438BP		alpha	2009	Clinical	Brazil	Mato Grosso do Sul	Central West	73	KU713774	48	KU713919	53	KU713625	4	KU714069	1	KU714219	15	KU714368	2	KU725590	272	This study	NA
4PI	LILINE 4	alpha	2008	Clinical	Brazil	Piauí	Northeast	14	KU713775	6	KU713920	15	KU713626	4	KU714070	2	KU714220	15	KU714369	2	KU725591	124	This study	NA
59PI	LILINE 59	alpha	2010	Clinical	Brazil	Piauí	Northeast	2	KU713776	6	KU713921	25	KU713627	4	KU714071	1	KU714221	1	KU714370	2	KU725592	281	This study	NA
5PI	LILINE 5	alpha	2007	Clinical	Brazil	Piauí	Northeast	2	KU713777	27	KU713922	52	KU713628	4	KU714072	2	KU714222	27	KU714371	32	KU725593	125	This study	NA
64PI	LILINE 64	alpha	NA	Clinical	Brazil	Piauí	Northeast	2	KU713778	6	KU713923	54	KU713629	4	KU714073	26	KU714223	100	KU714372	2	KU725594	282	This study	NA
6PI	LILINE 6	alpha	2008	Clinical	Brazil	Piauí	Northeast	4	KU713779	6	KU713924	26	KU713630	4	KU714074	9	KU714224	57	KU714373	2	KU725595	126	This study	NA
8PI	LILINE 8	alpha	2007	Clinical	Brazil	Piauí	Northeast	2	KU713780	6	KU713925	26	KU713631	4	KU714075	2	KU714225	55	KU714374	7	KU725596	128	This study	NA
CFP 352	DW01	alpha	2011	Environmental	Brazil	Amazonas	North	2	KU713781	6	KU713926	10	KU713632	4	KU714076	2	KU714226	15	KU714375	2	KU725597	7	[3]	25688971
CFP 353	DW02	alpha	2011	Environmental	Brazil	Amazonas	North	3	KU713782	16	KU713927	15	KU713633	4	KU714077	9	KU714227	23	KU714376	2	KU725598	5	[3]	25688971
CFP 354	DW03	alpha	2011	Environmental	Brazil	Amazonas	North	21	KU713783	6	KU713928	25	KU713634	4	KU714078	2	KU714228	27	KU714377	7	KU725599	264	[3]	25688971
CFP 388	DW13	alpha	2011	Environmental	Brazil	Amazonas	North	3	KU713784	16	KU713929	15	KU713635	4	KU714079	9	KU714229	27	KU714378	2	KU725600	265	[3]	25688971
CFP 409	SI13	alpha	2011	Environmental	Brazil	Amazonas	North	1	KU713785	1	KU713930	4	KU713636	4	KU714080	16	KU714230	14	KU714379	7	KU725601	266	[3]	25688971
CFP 410	SI17	a	2011	Environmental	Brazil	Amazonas	North	69	KU713786	6	KU713931	82	KU713637	4	KU714081	1	KU714231	14	KU714380	6	KU725602	268	[3]	25688971
CFP 411	SI18	alpha	2011	Environmental	Brazil	Amazonas	North	1	KU713787	1	KU713932	4	KU713638	4	KU714082	1	KU714232	14	KU714381	7	KU725603	20	[3]	25688971
CFP 417	SI24	alpha	2011	Environmental	Brazil	Amazonas	North	2	KU713788	1	KU713933	4	KU713639	4	KU714083	1	KU714233	14	KU714382	7	KU725604	267	[3]	25688971
IAL3225		alpha	NA	Clinical	Brazil	São Paulo	Southeast	21	KU713789	6	KU713934	25	KU713640	4	KU714084	2	KU714234	27	KU714383	7	KU725605	264	[1]	25028429
IAL3226		alpha	NA	Clinical	Brazil	São Paulo	Southeast	38	KU713790	21	KU713935	27	KU713641	4	KU714085	27	KU714235	58	KU714384	2	KU725606	306	This study	NA
IAL3227		alpha	NA	Clinical	Brazil	São Paulo	Southeast	40	KU713791	35	KU713936	57	KU713642	4	KU714086	1	KU714236	59	KU714385	2	KU725607	129	This study	NA
IAL3229		a	NA	Clinical	Brazil	São Paulo	Southeast	38	KU713792	49	KU713937	53	KU713643	21	KU714087	2	KU714237	58	KU714386	2	KU725608	316	This study	NA
IAL3230		a and alpha	NA	Clinical	Brazil	São Paulo	Southeast	75	KU713793	6	KU713938	28	KU713644	28	KU714088	1	KU714238	7	KU714387	2	KU725609	317	This study	NA
IAL3232		alpha	NA	Clinical	Brazil	São Paulo	Southeast	4	KU713794	21	KU713939	28	KU713645	4	KU714089	27	KU714239	58	KU714388	2	KU725610	300	This study	NA
IAL3233		alpha	NA	Clinical	Brazil	São Paulo	Southeast	4	KU713795	22	KU713940	26	KU713646	4	KU714090	27	KU714240	7	KU714389	3	KU725611	40	This study	NA
IAL3234		alpha	NA	Clinical	Brazil	São Paulo	Southeast	33	KU713796	6	KU713941	25	KU713647	29	KU714091	1	KU714241	1	KU714390	1	KU725612	137	[1]	25028429
IAL3235		alpha	NA	Clinical	Brazil	São Paulo	Southeast	14	KU713797	48	KU713942	53	KU713648	4	KU714092	1	KU714242	7	KU714391	2	KU725613	307	This study	NA
IAL3236		alpha	NA	Clinical	Brazil	São Paulo	Southeast	4	KU713798	22	KU713943	26	KU713649	4	KU714093	27	KU714243	7	KU714392	3	KU725614	40	This study	NA
IAL3237		alpha	NA	Clinical	Brazil	São Paulo	Southeast	4	KU713799	22	KU713944	26	KU713650	4	KU714094	27	KU714244	7	KU714393	3	KU725615	40	This study	NA
IAL3238		alpha	NA	Clinical	Brazil	São Paulo	Southeast	4	KU713800	22	KU713945	26	KU713651	4	KU714095	27	KU714245	7	KU714394	3	KU725616	40	This study	NA
IAL3239		alpha	NA	Clinical	Brazil	São Paulo	Southeast	38	KU713801	21	KU713946	27	KU713652	4	KU714096	27	KU714246	58	KU714395	2	KU725617	306	This study	NA
IAL3240		alpha	NA	Clinical	Brazil	São Paulo	Southeast	38	KU713802	49	KU713947	53	KU713653	21	KU714097	2	KU714247	58	KU714396	2	KU725618	316	This study	NA
IAL3241		a	NA	Clinical	Brazil	São Paulo	Southeast	14	KU713803	21	KU713948	27	KU713654	28	KU714098	27	KU714248	7	KU714397	2	KU725619	302	This study	NA
IAL3243		a	NA	Clinical	Brazil	São Paulo	Southeast	2	KU713804	6	KU713949	16	KU713655	4	KU714099	16	KU714249	4	KU714398	2	KU725620	283	[1]	25028429
IAL3244		alpha	NA	Clinical	Brazil	São Paulo	Southeast	15	KU713805	6	KU713950	27	KU713656	28	KU714100	22	KU714250	10	KU714399	2	KU725621	308	This study	NA
IAL3245		alpha	NA	Clinical	Brazil	São Paulo	Southeast	14	KU713806	48	KU713951	53	KU713657	4	KU714101	1	KU714251	7	KU714400	2	KU725622	307	This study	NA
IAL3246		alpha	NA	Clinical	Brazil	São Paulo	Southeast	10	KU713807	6	KU713952	16	KU713658	4	KU714102	16	KU714252	20	KU714401	2	KU725623	185	This study	NA
IAL3248		alpha	NA	Clinical	Brazil	São Paulo	Southeast	4	KU713808	22	KU713953	26	KU713659	4	KU714103	27	KU714253	7	KU714402	3	KU725624	40	This study	NA
IAL3249		alpha	NA	Clinical	Brazil	São Paulo	Southeast	5	KU713809	21	KU713954	38	KU713660	4	KU714104	16	KU714254	14	KU714403	6	KU725625	303	This study	NA
IAL3251		alpha	NA	Clinical	Brazil	São Paulo	Southeast	4	KU713810	22	KU713955	26	KU713661	4	KU714105	27	KU714255	7	KU714404	3	KU725626	40	This study	NA
IAL3252		alpha	NA	Clinical	Brazil	São Paulo	Southeast	38	KU713811	50	KU713956	90	KU713662	4	KU714106	27	KU714256	7	KU714405	2	KU725627	311	This study	NA
IAL3253		alpha	NA	Clinical	Brazil	São Paulo	Southeast	4	KU713812	22	KU713957	26	KU713663	4	KU714107	27	KU714257	7	KU714406	3	KU725628	40	This study	NA
IAL3254		a	NA	Clinical	Brazil	São Paulo	Southeast	2	KU713813	35	KU713958	57	KU713664	4	KU714108	1	KU714258	104	KU714407	2	KU725629	309	This study	NA
IAL3255		a	NA	Clinical	Brazil	São Paulo	Southeast	2	KU713814	6	KU713959	93	KU713665	4	KU714109	1	KU714259	58	KU714408	2	KU725630	312	This study	NA
IAL3256		a	NA	Clinical	Brazil	São Paulo	Southeast	4	KU713815	6	KU713960	53	KU713666	4	KU714110	2	KU714260	101	KU714409	2	KU725631	304	This study	NA
IAL3257		alpha	NA	Clinical	Brazil	São Paulo	Southeast	15	KU713816	6	KU713961	27	KU713667	28	KU714111	22	KU714261	10	KU714410	2	KU725632	308	This study	NA
IAL3258		alpha	NA	Clinical	Brazil	São Paulo	Southeast	8	KU713817	6	KU713962	22	KU713668	4	KU714112	2	KU714262	87	KU714411	3	KU725633	182	This study	NA
IAL3259		alpha	NA	Clinical	Brazil	São Paulo	Southeast	4	KU713818	22	KU713963	26	KU713669	4	KU714113	27	KU714263	7	KU714412	3	KU725634	40	This study	NA
IAL3261		alpha	NA	Clinical	Brazil	São Paulo	Southeast	3	KU713819	6	KU713964	57	KU713670	4	KU714114	18	KU714264	91	KU714413	2	KU725635	305	This study	NA
IAL3262		alpha	NA	Clinical	Brazil	São Paulo	Southeast	38	KU713820	49	KU713965	53	KU713671	21	KU714115	2	KU714265	58	KU714414	2	KU725636	316	This study	NA
IAL3263		alpha	NA	Clinical	Brazil	São Paulo	Southeast	4	KU713821	22	KU713966	26	KU713672	4	KU714116	40	KU714266	7	KU714415	3	KU725637	313	This study	NA
IAL3264		alpha	NA	Clinical	Brazil	São Paulo	Southeast	8	KU713822	6	KU713967	22	KU713673	4	KU714117	2	KU714267	87	KU714416	3	KU725638	182	This study	NA
IAL3265		alpha	NA	Clinical	Brazil	São Paulo	Southeast	4	KU713823	17	KU713968	80	KU713674	16	KU714118	1	KU714268	88	KU714417	7	KU725639	172	This study	NA
IAL3266		alpha	NA	Clinical	Brazil	São Paulo	Southeast	8	KU713824	6	KU713969	92	KU713675	21	KU714119	2	KU714269	15	KU714418	2	KU725640	314	This study	NA
IAL3267		alpha	NA	Clinical	Brazil	São Paulo	Southeast	14	KU713825	48	KU713970	53	KU713676	4	KU714120	1	KU714270	7	KU714419	2	KU725641	307	This study	NA
IAL3268		alpha	NA	Clinical	Brazil	São Paulo	Southeast	34	KU713826	6	KU713971	9	KU713677	4	KU714121	16	KU714271	9	KU714420	2	KU725642	28	This study	NA
IAL3269		alpha	NA	Clinical	Brazil	São Paulo	Southeast	68	KU713827	6	KU713972	82	KU713678	4	KU714122	16	KU714272	94	KU714421	6	KU725643	248	This study	NA
IAL3270		alpha	NA	Clinical	Brazil	São Paulo	Southeast	77	KU713828	6	KU713973	53	KU713679	4	KU714123	2	KU714273	58	KU714422	2	KU725644	310	This study	NA
IAL3271		alpha	NA	Clinical	Brazil	São Paulo	Southeast	4	KU713829	22	KU713974	26	KU713680	4	KU714124	27	KU714274	7	KU714423	3	KU725645	40	This study	NA
IAL3272		a	NA	Clinical	Brazil	São Paulo	Southeast	2	KU713830	35	KU713975	57	KU713681	4	KU714125	1	KU714275	104	KU714424	2	KU725646	309	This study	NA
IAL3273		alpha	NA	Clinical	Brazil	São Paulo	Southeast	68	KU713831	6	KU713976	82	KU713682	4	KU714126	16	KU714276	94	KU714425	6	KU725647	28	This study	NA
IAL3275		alpha	NA	Clinical	Brazil	São Paulo	Southeast	4	KU713832	21	KU713977	26	KU713683	4	KU714127	27	KU714277	7	KU714426	3	KU725648	325	This study	NA
IAL3276		a	NA	Clinical	Brazil	São Paulo	Southeast	14	KU713833	6	KU713978	53	KU713684	4	KU714128	27	KU714278	7	KU714427	2	KU725649	301	This study	NA
IAL3277		alpha	NA	Clinical	Brazil	São Paulo	Southeast	1	KU713834	1	KU713979	4	KU713685	4	KU714129	1	KU714279	14	KU714428	7	KU725650	20	This study	NA
IAL3278		a	NA	Clinical	Brazil	São Paulo	Southeast	4	KU713835	6	KU713980	53	KU713686	4	KU714130	2	KU714280	101	KU714429	2	KU725651	304	This study	NA
IAL3279		a	NA	Clinical	Brazil	São Paulo	Southeast	2	KU713836	35	KU713981	57	KU713687	4	KU714131	1	KU714281	104	KU714430	2	KU725652	309	This study	NA
IAL3280		alpha	NA	Clinical	Brazil	São Paulo	Southeast	4	KU713837	21	KU713982	26	KU713688	4	KU714132	27	KU714282	7	KU714431	3	KU725653	325	This study	NA
IAL3282		alpha	NA	Clinical	Brazil	São Paulo	Southeast	2	KU713838	22	KU713983	91	KU713689	21	KU714133	1	KU714283	106	KU714432	2	KU725654	315	This study	NA
IAL3283		a	NA	Clinical	Brazil	São Paulo	Southeast	2	KU713839	6	KU713984	16	KU713690	4	KU714134	16	KU714284	4	KU714433	2	KU725655	283	This study	NA
IAL3284		alpha	NA	Clinical	Brazil	São Paulo	Southeast	4	KU713840	22	KU713985	26	KU713691	4	KU714135	27	KU714285	7	KU714434	3	KU725656	40	This study	NA
WM 06.8	LA43, NUAM176, CBS 8684, IMH 1658, AMFC1602, 46A	alpha	1996	Environmental	Uruguay	Quebrada de los Cuervos		7	FR677269	6	KU713986	32	FR677322	21	FR677284	25	KU714286	2	FR677298	2	FR677294	3	[4]	16222245
LMM 21	CBS11250, LA84, HEC11102, AMFC1643, WM 540, WM 477	alpha	1994	Clinical	Brazil	Rio de Janeiro	Southeast	28	FR677272	6	KU713987	15	KU713692	29	KU714136	18	KU714287	1	KU714435	1	KU725657	4	[2]	21383989
WM 2517	CBS11539, PWQ 697, 14-1434, Jackson, 6003508t, 571140, WA861, WM 08.311, WM 08.131, JH3622	alpha	2000	Veterinary	Australia	Western Australia	Western Australia	3	KU713841	16	FR677274	15	FR677318	4	KU714137	9	FR677290	23	FR677307	2	KU725658	5	[2]	21383989
B7432			2009	Clinical	United States	Oregon	Pacific Northwest	4	FR677267	6	KU713988	15	KU713693	4	KU714138	1	KU714288	15	KU714436	2	KU725659	6	[2]	21383989
WM 05.349	H0058-I-1391	a		Clinical	Colombia	Bogotá		2	KF756945	6	KF756956	10	KF756967	4	KF756976	18	KF756988	12	KF756992	2	KF757001	8	[5]	25411779
WM 05.397	H0058-I-1543	alpha		Clinical	Colombia	Bogotá		11	KF756947	21	KF756960	6	KF756966	4	KF756976	16	KF756986	5	KF756991	2	KF757001	12	[5]	25411779
WM 05.77	CBS10090, AV55	a	1998	Clinical	Greece	Athens		2	KC542442	27	KC568603	10	KC581266	4	KC568669	1	KC568801	8	FR677299	7	KC568735	18	[2]	21383989
IUM00-5363		a	2000	Clinical	Greece	Athens		2	HM205669	27	HM205774	31	HM206326	4	HM206281	1	HM207138	8	HM207463	7	HM207886	19	[6]	23017442
WM 178	CBS10082; IFM 50894; 49435; MYA-4561; AMFC38; Colter	alpha	1991	Clinical	Australia	Sydney	New South Wales	1	KC542445	17	FR677275	16	KC581269	16	KC568672	14	KC568804	19	KC581203	7	KC568738	21	[2]	21383989
CBS10602	HK1432	alpha	1998	Clinical	China	Hong Kong		1	HM205622	17	HM205775	16	HM206348	16	HM206301	14	HM207091	19	HM207488	7	HM207867	21	[6]	23017442
WM 06.33	CBS1930, RV71421	a	1953	Veterinary	Aruba			2	HQ851556	6	HQ851671	25	HM998160	4	HM206253	18	FR677293	12	HQ851901	10	FR677314	25	[2]	21383989
MC-S-115	WM 04.75		1993	Clinical	Thailand			2	GU079817	6	GU079849	32	KC306863	4	GU079911	2	GU079699	15	GU079730	2	GU079773	30	[8]	23861989
WM 04.72	PWQ 314; W12	alpha	1994	Clinical	Australia	Western Australia	Western Australia	3	KU713842	2	KU713989	6	KU713694	7	KU714139	1	KU714289	18	FR677300	5	KU725660	33	[2]	21383989
AV54W	AV54 White, AV54, CBS10088	alpha	2001	Clinical	Greece	Thessaloniki		8	HM205654	16	HM205761	35	HM206337	4	HM206282	2	HM207184	3	HM207433	7	HM207887	35	[7]	18261945
WM 09.94	PWQ 1009; Q01/1067864N	alpha	2005	Veterinary	Australia	Western Australia	Western Australia	14	FR677270	21	KU713990	27	KU713695	28	KU714140	27	KU714290	46	KU714437	2	KU725661	38	[2]	21383989
WM 08.310	PWQ 655, 14-1433; Malley; M25183	alpha	1999	Veterinary	Australia	Western Australia		27	FR677271	6	KU713991	4	KU713696	4	KU714141	1	KU714291	43	KU714438	7	KU725662	48	[2]	21383989
B7390		alpha	2008	Clinical	United States	Idaho		30	GU250877	6	n/a	15	n/a	4	n/a	1	n/a	15	n/a	2	n/a	49	[9]	24019979
B8973		alpha		Clinical	United States	Hawaii		2	n/a	25	n/a	4	n/a	21	n/a	9	n/a	8	n/a	7	n/a	50	[9]	24019979
CCA242A	CBS11727	alpha	2005	Clinical	Spain	Alicante		2	HM205661	25	HM205756	26	n/a	21	HM206198	9	n/a	8	HM207464	7	HM207875	169	[6]	23017442
IP2003/125		alpha	2003	Clinical	France			2	HM205665	25	HM205753	26	HM206371	21	HM206202	9	HM207194	8	HM207460	7	HM207882	169	[4]	16222245
CCA242G	CBS11801	alpha	2005	Clinical	Spain	Alicante		2	HM205662	25	HM205757	26	HM206417	21	HM206199	9	HM207189	90	HM207457	7	HM207876	170	[6]	23017442
RDH9	JH3745; CBS11534	alpha		Clinical	Australia	Darwin	Northern Territory	3	HM205686	2	HM205815	6	HM206365	7	HM206217	1	HM207155	15	HM207486	5	HM207798	171	[4]	16222245
IP1999/901-1		alpha	1999	Clinical	France			4	HM205706	21	HM205771	21	HM206331	4	HM206279	16	HM207164	93	HM207446	2	HM207834	173	[4]	16222245
IP2001/935-1	CBS12010	alpha		Clinical	Senegal			4	HM205702	21	HM205767	21	HM206328	4	HM206270	16	HM207161	93	HM207443	2	HM207830	173	[4]	16222245
IFM56776	NG20090401	a		Clinical	Brazil			4	HM205700	21	HM205765	26	HM206370	28	HM206219	27	HM207191	7	HM207440	2	HM207825	174	[6]	23017442
ICB183	MT-W10	alpha		Environmental	Brazil	São Paulo	Southeast	4	HM205699	21	HM205763	30	HM206375	4	HM206264	18	HM207200	95	HM207451	2	HM207822	175	[10]	15004118
IP1993/980	CBS12007	alpha	1993	Clinical	France			4	HM205703	22	HM205764	27	HM206333	21	HM206203	19	HM207169	7	HM207441	3	HM207804	176	[6]	23017442
IHEM11489S	RV68683	alpha	1991	Clinical	Republic of Congo	Kinshasa		5	HM205675	6	HM205799	29	HQ706621	4	HM206267	14	HM207095	92	HM207455	2	HM207826	177	[6]	23017442
IHEM11489W	RV68683	alpha	1991	Clinical	Republic of Congo	Kinshasa		5	HM205676	6	HM205800	29	HM206319	51	HM206209	14	HM207096	92	HM207454	2	HM207827	178	[6]	23017442
46A	IMH 1658, AMFC1602, LA43, NUAM176, CBS8684	alpha	1989	Environmental	Uruguay	Quebrada de los Cuervos		7	HM205688	6	HM205784	26	HM206366	21	HM206196	22	HM207167	2	HM207429	44	HM207842	179	[6]	23017442
ICB97	MT-97	alpha		Clinical	Brazil	São Paulo	Southeast	8	HM205648	24	HM205781	25	HM206323	4	HM206266	24	HM207190	57	HM207487	2	HM207824	183	[6]	23017442
IP1997/170	CBS12009	alpha	1997	Clinical	French Guyana			9	HM205674	21	HM205770	28	HM206334	21	HM206204	2	HM207181	89	HM207493	7	HM207883	184	[6]	23017442
A1M-F3016	A1M-F3016, JH3063, CBS11243	alpha		Veterinary	Canada	British Columbia	Pacific Northwest	66	HQ851547	1	HQ851662	4	HM206390	4	HQ851440	1	HQ851777	14	HQ851892	7	HQ852007	246	[6]	23017442
CRY0146		a		Environmental	Brazil	Espírito Santo	Southeast	67	HM205692	46	HM205808	81	HM206316	4	HM206256	38	HM207099	91	HM207450	2	HM207816	247	[6]	23017442
LA362	CBS11260, UNSP Bird1, Bird1	alpha	2000	Environmental	Brazil	São Paulo	Southeast	68	HM205679	6	HM205805	82	HM998216	4	HM206290	16	HM207166	94	HM207452	6	HM207902	248	[6]	23017442
170102053	UBC Storage#=3415	alpha	2011	Veterinary	Canada	British Columbia	Pacific Northwest	1	HM205600	1	HM205711	4	HM206376	4	HM206221	1	HM207101	14	HM207388	2	HM207806	250	[6]	23017442
1080405336	UBC Storage#=3490	alpha	2012	Veterinary	United States	Washington		1	HM205612	1	HM205722	4	HM206387	4	HM206234	1	HM207112	14	HM207399	2	HM207810	250	[6]	23017442
RB50	WM 02.316; JH3109; CBS11256	alpha		Environmental	Canada	British Columbia	Pacific Northwest	1	HM205638	1	HM205747	4	HM206411	51	HM206210	1	HM207150	14	HM207424	7	HM207895	251	[6]	23017442
ICB107	MT-107	alpha		Clinical	Brazil	São Paulo		1	HM205631	1	HM205740	4	HM206405	52	HM206218	1	HM207137	14	HM207417	7	HM207881	252	[10]	15004118
KB15181	UBC Storage#=3223	alpha	2005	Veterinary	Canada	British Columbia	Pacific Northwest	1	HM205632	1	HM205741	26	HM206374	4	HM206283	1	HM207139	14	HM207418	7	HM207888	253	[6]	23017442
CBS10604	HK4359	alpha	1998	Clinical	China	Hong Kong		1	HM205624	17	HM205777	16	HM206350	16	HM206303	14	HM207093	19	HM207490	43	HM207901	255	[6]	23017442
B9764		alpha		Veterinary	United States	Washington		1	n/a	17	n/a	4	n/a	16	n/a	14	n/a	19	n/a	7	n/a	260	[9]	24019979
H0058-I-638	WM 04.76, WM 1904, LA567, LA221	alpha		Clinical	Colombia	Caquetá		2	KF756945	6	KF756956	45	KF756970	4	KF756976	18	KF756988	12	KF756992	10	KF757003	321	[5]	25411779
H0058-I-2052		a		Clinical	Colombia	Risaralda		14	KF756948	21	KF756960	94	KF756972	4	KF756976	18	KF756988	107	KF757000	7	KF757002	322	[5]	25411779
H0058-I-3146		a		Clinical	Colombia	Norte de Santander		2	KF756945	6	KF756956	95	KF756973	4	KF756976	18	KF756988	12	KF756992	10	KF757003	323	[5]	25411779
H0058-I-3407		a		Clinical	Colombia	Norte de Santander		2	KF756945	21	KF756960	25	KF756969	4	KF756976	41	KF756990	12	KF756992	2	KF757001	324	[5]	25411779
H0058-I-762	WM 04.78, WM 1864, LA590, LA224	alpha		Clinical	Colombia	Santander		4	KF756946	6	KF756956	6	KF756966	4	KF756976	18	KF756988	22	KF756993	2	KF757001	31	[5]	25411779
ICB184	CBS11253; ICB180	alpha		Environmental	Brazil	São Paulo		14	HQ851561	6	HQ851676	15	HM206345	4	HM206265	2	HQ851791	15	HQ851906	2	HQ852021	124	[6]	23017442
260313271	UBC Storage#=3283	alpha	2006	Veterinary	Canada	British Columbia		2	HM205655	6	HM205782	10	HM206307	4	HM206225	2	HM207170	15	HM207469	7	HM207847	168	[6]	23017442
n/a not applicable - Sequences deposited at mlst.mycologylab.org
References.
1. Engelthaler DM, Hicks ND, Gillece JD, Roe CC, Schupp JM, Driebe EM, et al. Cryptococcus gattii in North American Pacific Northwest: whole-population genome analysis provides insights into species evolution and dispersal. mBio. 2014;5: e01464-01414.
2. Carriconde F, Gilgado F, Arthur I, Ellis D, Malik R, van de Wiele N, et al. Clonality and alpha-a recombination in the Australian Cryptococcus gattii VGII population--an emerging outbreak in Australia. PloS one. 2011;6: e16936.
3. Brito-Santos F, Barbosa GG, Trilles L, Nishikawa MM, Wanke B, Meyer W, et al. Environmental isolation of Cryptococcus gattii VGII from indoor dust from typical wooden houses in the deep Amazonas of the Rio Negro basin. PloS one. 2015;10: e0115866.
4. Fraser JA, Giles SS, Wenink EC, Geunes-Boyer SG, Wright JR, Diezmann S, et al. Same-sex mating and the origin of the Vancouver Island Cryptococcus gattii outbreak. Nature. 2005;437: 1360-1364.
5. Lizarazo J, Escandón P, Agudelo CI, Firacative C, Meyer W, Castañeda E. Retrospective study of the epidemiology and clinical manifestations of Cryptococcus gattii infections in Colombia from 1997-2011. PLoS Negl Trop Dis. 2014;8(11):e3272.
6. Hagen F, Colom MF, Swinne D, Tintelnot K, Iatta R, Montagna MT, Torres-Rodriguez JM, Cogliati M, Velegraki A, Burggraaf A, Kamermans A, Sweere JM, Meis JF, Klaassen CH, Boekhout T. Autochthonous and dormant Cryptococcus gattii infections in Europe. Emerg Infect Dis. 2012;18(10):1618-1624.
7. Bovers M, Hagen F, Kuramae EE, Boekhout T. Six monophyletic lineages identified within Cryptococcus neoformans and Cryptococcus gattii by multi-locus sequence typing. Fungal Genet Biol. 2008;45(4):400-421.
8. Kaocharoen S, Ngamskulrungroj P, Firacative C, Trilles L, Piyabongkarn D, Banlunara W, et al. Molecular epidemiology reveals genetic diversity amongst isolates of the Cryptococcus neoformans/C. gattii species complex in Thailand. PLoS Neg Trop Dis. 2013;7: e2297.
9. Lockhart SR, Iqbal N, Harris JR, Grossman NT, DeBess E, Wohrle R, et al. Cryptococcus gattii in the United States: genotypic diversity of human and veterinary isolates. PloS one. 2013;8: e74737.
10. Barreto de Oliveira MT, Boekhout T, Theelen B, Hagen F, Baroni FA, Lazera MS, Lengeler KB, Heitman J, Rivera IN, Paula CR. Cryptococcus neoformans shows a remarkable genotypic diversity in Brazil. J Clin Microbiol. 2004;42(3):1356-1359.
